# Supplementary material for: Impact of Rising Temperature in the Deposition Patterns of Bioactive Compounds in Field Grown Food Barley Grains
Source: MDPI journal article supplement (doi:10.3390/plants10030598), 2021-03-22
Supplement: s1 [file s1]

## Supplementary Files

# Impact of rising temperature in the deposition patterns of bioactive compounds in field grown food barley grains

Mariona Martínez-Subirà, Marian Moralejo, Eva Puig, MariPaz Romero, Roxana Savin, Ignacio Romagosa\*.

University of Lleida, AGROTECNIO-CERCA Center, Av. Rovira Roure 191, 25198 Lleida, Spain

\*Correspondence: ignacio.romagosa@udl.cat; Tel.: +34 973 702534

**Table S1.** Grain characteristics and average final contents of grain weight (GW),  $\beta$ -glucans, arabinoxylans, total phenolic compounds and antioxidant capacity (AC) of four barley genotypes during two consecutive seasons of the control samples without heat stress.

| Genotype   | Endosperm              | Hull     | Row             | Colour | $\beta$ -glucan content | Average final contents of two growing seasons |                         |                      |                                |                          |       |
|------------|------------------------|----------|-----------------|--------|-------------------------|-----------------------------------------------|-------------------------|----------------------|--------------------------------|--------------------------|-------|
|            |                        |          |                 |        |                         | GW (mg)                                       | $\beta$ -glucan (mg/ g) | Arabinoxylan (mg/ g) | Phenolic compounds (mg/ GAE g) | AC ( $\mu$ molTrolox/ g) |       |
| Annapurna  | Spanish variety        | Waxy     | Naked           | 2      | Yellow                  | High                                          | 51 a                    | 79 a                 | 55 a                           | 4.6 bc                   | 111 b |
| Hindukusch | Afghan landrace        | Non-waxy | Partially naked | 2      | Purple                  | Medium                                        | 47 ab                   | 68 b                 | 55 a                           | 5.7 a                    | 140 a |
| Hispanic   | Spanish variety        | Waxy     | Hulled          | 2      | Yellow                  | Low                                           | 52 a                    | 50 c                 | 41 c                           | 4.2 c                    | 91 c  |
| Tamalpais  | North American variety | Waxy     | Naked           | 6      | Yellow                  | High                                          | 44 b                    | 80 a                 | 45 b                           | 4.9 b                    | 110 a |

Results are presented as mean. Mean with a column followed by different letters indicate significant differences; Tukey-Kramer ( $\alpha = 0.05$ ).
